# Supplementary material for: Vibrio cholerae accessory colonisation factor AcfC: a chemotactic protein with a role in hyperinfectivity
Source: PubMed Central journal article supplement (PMC5976639; doi:10.1038/s41598-018-26570-7), 2018-05-30
Supplement: 41598_2018_26570_MOESM1_ESM.pdf [file 41598_2018_26570_MOESM1_ESM.pdf]

**Supplementary information: *Vibrio cholerae* accessory colonisation factor AcfC: a chemotactic protein with a role in hyperinfectivity**

**Esmeralda Valiente<sup>1</sup>, Cadi Davies<sup>1</sup>, Dominic C. Mills<sup>2</sup>, Maria Getino<sup>3</sup>, Jennifer M. Ritchie<sup>3</sup> and Brendan W. Wren<sup>1\*</sup>**

<sup>1</sup> Department of Pathogen Molecular Biology, London School of Hygiene and Tropical Medicine, Keppel Street, WC1E 7HT, London, UK.

<sup>2</sup> Robert Frederick Smith School of Chemical and Biomolecular Engineering, Cornell University, Olin Hall, Ithaca, NY, USA

<sup>3</sup> Department of Microbial Sciences, Faculty of Health and Medical Sciences, University of Surrey, Guildford GU2 7XH, UK

\*Correspondence address: email: [Brendan.wren@lshtm.ac.uk](mailto:Brendan.wren@lshtm.ac.uk)

Department of Pathogen Molecular Biology, LSHTM, Keppel Street, London, WC1E 7HT, UK

Phone: +44 (0) 2079272288; Fax: + 44 (0) 207 6374314

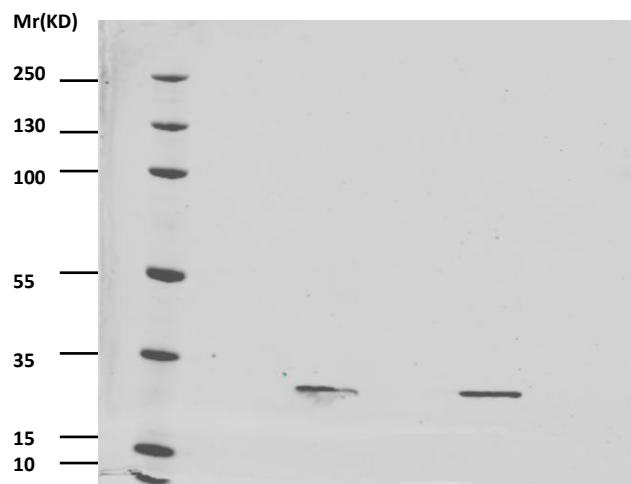

Supplementary figure 1. Un-cropped blot Figure 1b
